# Supplementary material for: Fabrication of charged membranes by the solvent-assisted lipid bilayer (SALB) formation method on SiO2and Al2O3
Source: Royal Society of Chemistry journal article supplement (doi:10.1039/c5cp01428j), 2015-01-01

## Supporting Information

### **Fabrication of Charged Membranes by the Solvent-Assisted Lipid Bilayer (SALB) Formation Method on SiO<sub>2</sub> and Al<sub>2</sub>O<sub>3</sub>**

Seyed R. Tabaei<sup>1,2</sup>, Setareh Vafaei<sup>1,2</sup>, Nam-Joon Cho<sup>\*,1,2,3</sup>

<sup>1</sup>School of Materials Science and Engineering, Nanyang Technological University, 50 Nanyang Avenue 639798, Singapore

<sup>2</sup>Centre for Biomimetic Sensor Science, Nanyang Technological University, 50 Nanyang Drive 637553, Singapore

<sup>3</sup>School of Chemical and Biomedical Engineering, Nanyang Technological University, 62 Nanyang Drive 637459, Singapore

\*Corresponding author.

E-mail: njcho@ntu.edu.sg

**SI-Fig. 1** Frequency and dissipation response for DOPS containing bilayer formation on  $\text{SiO}_2$  at pH 5 using vesicle fusion method. Arrows indicate the injection of (1) tris buffer (10mM Tris, 150mM NaCl, pH 7.5), (2) buffer at pH 5 (10mM Tris, 150mM NaCl, pH 5), (3) lipid vesicle mixture in buffer at pH 5 [red curve: PC/PS (4/6), dashed line: PC/PS (9/1)], (4) buffer wash (pH 7.5), (5) BSA in annexin 5A buffer (10mM Tris, 150mM NaCl, 2 mM  $\text{CaCl}_2$ , pH 7.5) and (6) annexin 5A (5  $\mu\text{g/ml}$ ).

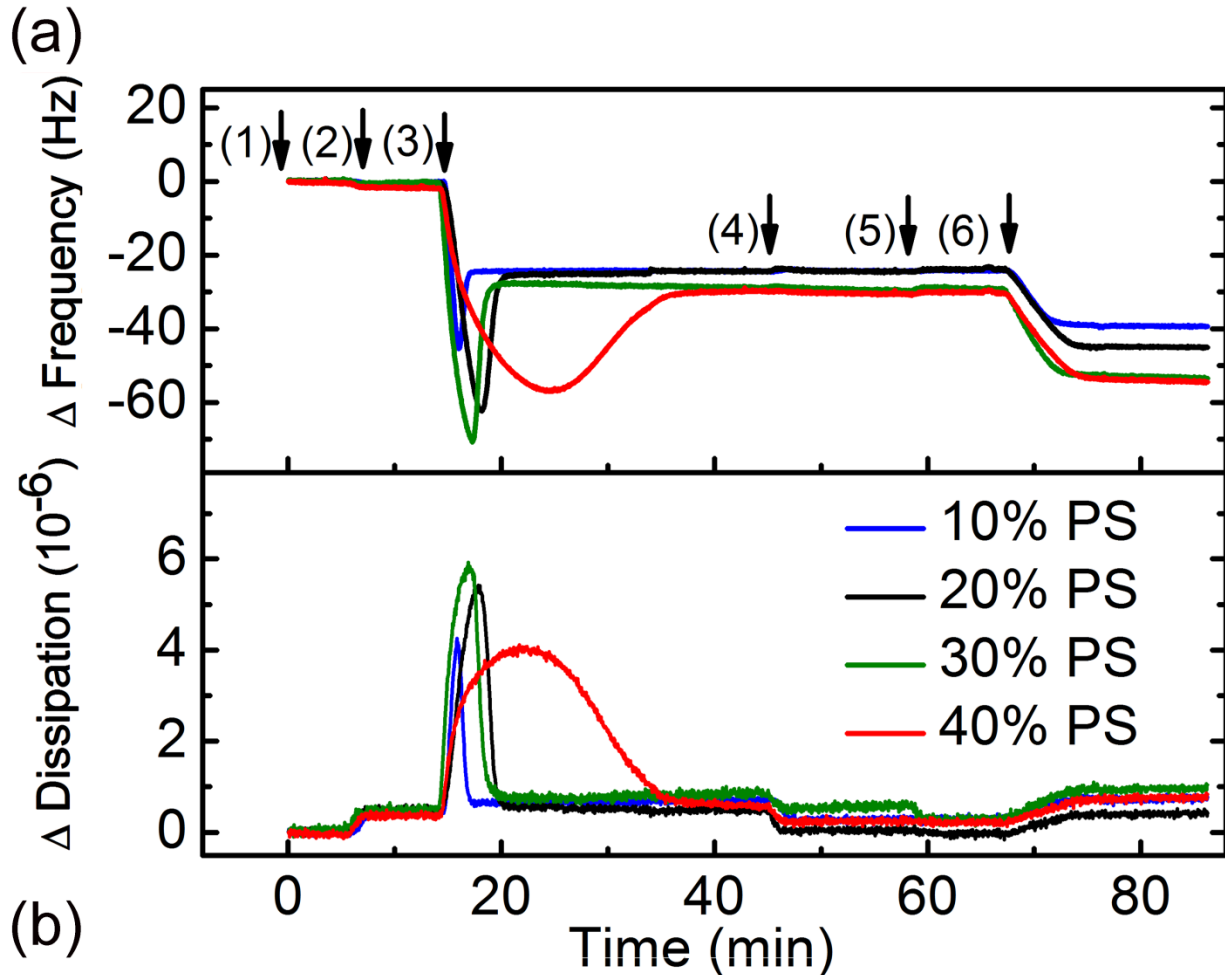

| Method         | Surface                | Composition | $\Delta f$ (Hz) | $\Delta D$ ( $\times 10^{-6}$ ) |
|----------------|------------------------|-------------|-----------------|---------------------------------|
| Vesicle Fusion | $\text{SiO}_2$<br>pH 5 | 10% PS      | $24.7 \pm 0.7$  | $< 0.7$                         |
|                |                        | 20% PS      | $25.6 \pm 0.4$  | $< 0.5$                         |
|                |                        | 30% PS      | $27.7 \pm 0.7$  | $< 0.7$                         |
|                |                        | 40% PS      | $29.5 \pm 0.5$  | $< 0.7$                         |

**SI-Fig. 2** Summary of QCM-D frequency and energy dissipation responses corresponding to formation of supported bilayer composed of DOPC/DOEPC produced by vesicle fusion and SALB formation method on (a, b)  $\text{SiO}_2$  and (c, d)  $\text{Al}_2\text{O}_3$ .

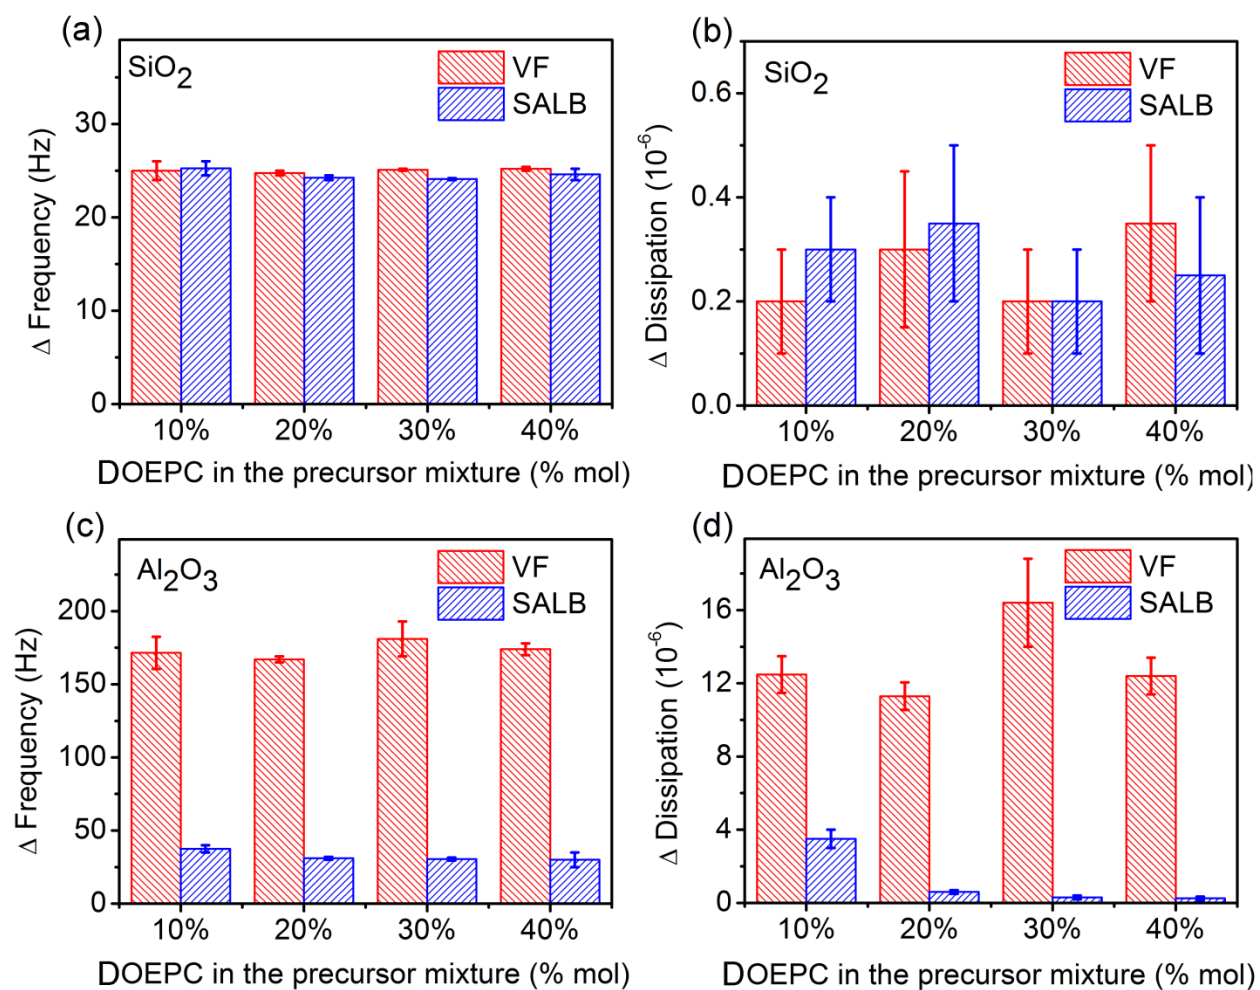

**SI-Fig. 3** Comparison of nonspecific adsorption of BSA protein to bare and positively charged bilayers-coated  $\text{Al}_2\text{O}_3$ . Negative QCM-D frequency changes upon injection of 0.1 mg/mL BSA indicates protein binding to bilayer defects. The final frequency shift after bilayer formation was set to zero and used as a baseline for frequency.

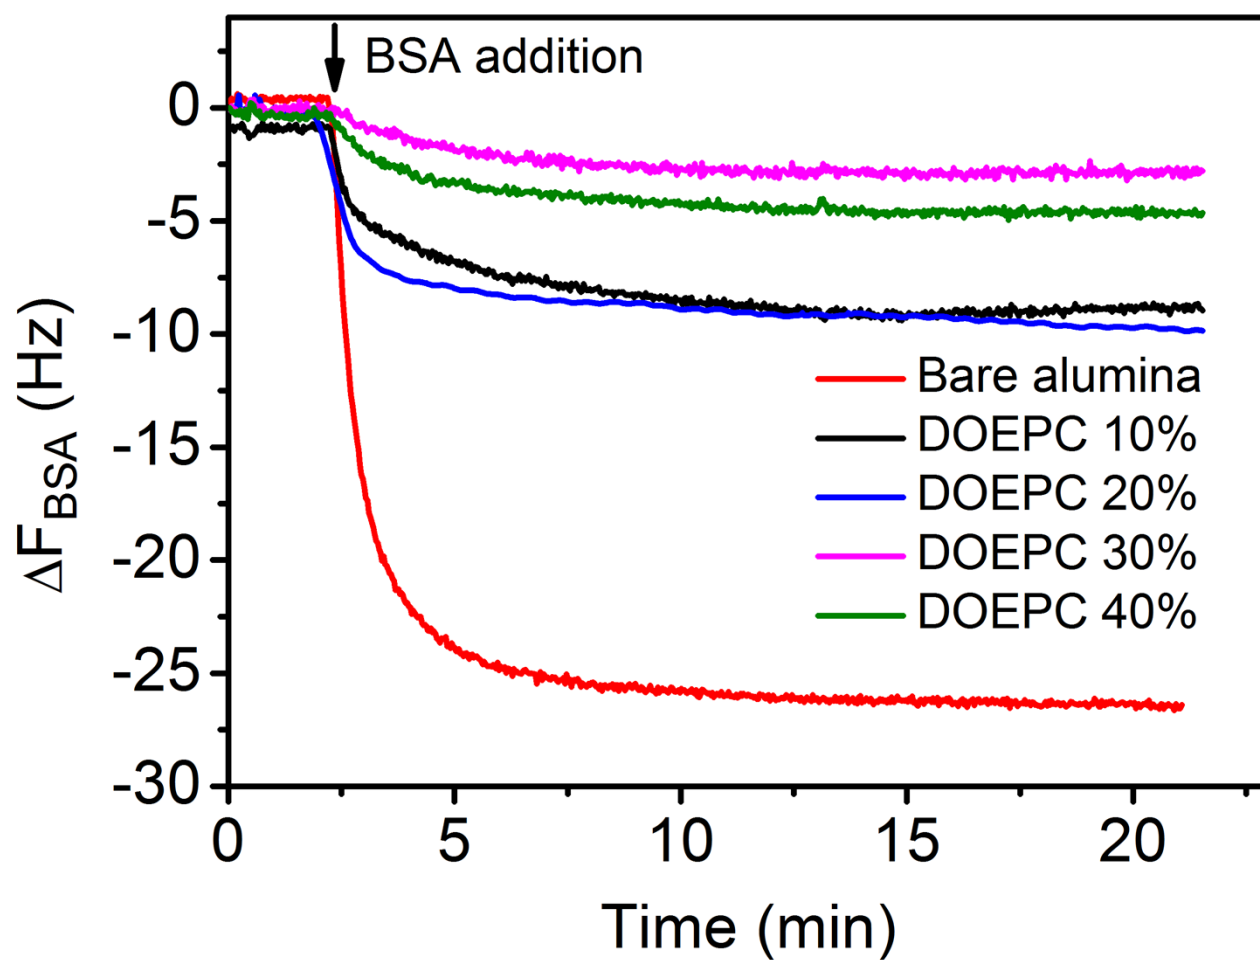

Supplement: c5cp01428j1.pdf [file c5cp01428j1.pdf]
